# Supplementary material for: Sulfane Sulfur Posttranslationally Modifies the Global Regulator AdpA to Influence Actinorhodin Production and Morphological Differentiation of Streptomyces coelicolor
Source: PubMed Central journal article supplement (PMC9239190; doi:10.1128/mbio.03862-21), 2022-04-25
Supplement: mbio.03862-21-sf002.pdf [file mbio.03862-21-sf002.pdf]

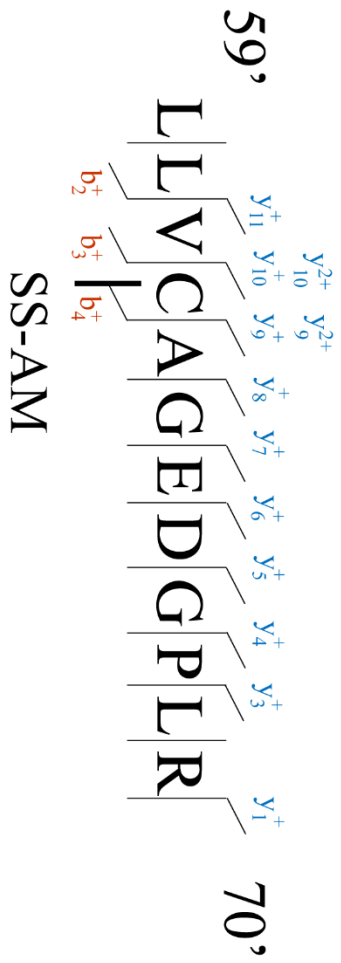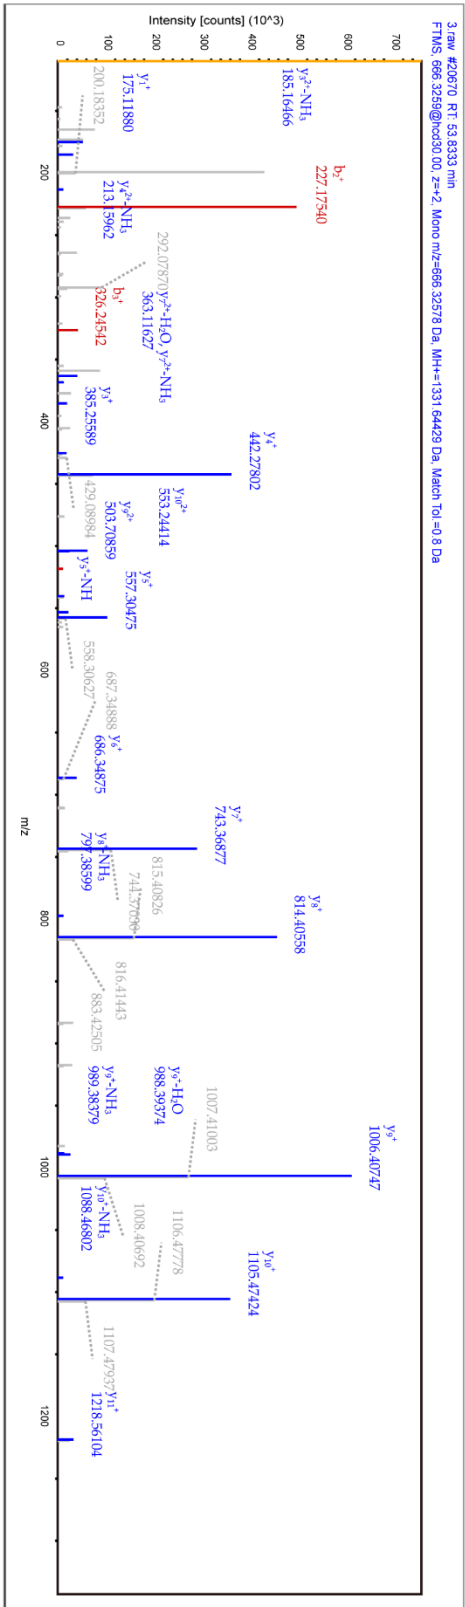

Peptide2 Sequence: LLVCAGEDGPLR, C4-SH->S-S-IAA (88,99300 Da), polysulfide-treated  
 Observed Mass MH+ (Da) : 1331.64429 Da, Observed Monoisotopic m/z: 666.32578 Da  
 Calculated Mass MH+ (Da) : 1331.64413 Da, Calculated Monoisotopic m/z: 666.32572 Da  
 Calculated Mass M (Da) : 1330.63685 Da  
 Identified with: Sequest HT (v1.17); XCorr:2.46, RT: 53.8333 min

**Figure S2.** MS<sup>2</sup> data of peptide 2 (Cys<sup>62</sup>-SH) (from HS<sub>n</sub>H treated AdpA).
