# Supplementary material for: Sulfane Sulfur Posttranslationally Modifies the Global Regulator AdpA to Influence Actinorhodin Production and Morphological Differentiation of Streptomyces coelicolor
Source: PubMed Central journal article supplement (PMC9239190; doi:10.1128/mbio.03862-21), 2022-04-25
Supplement: mbio.03862-21-sf003.pdf [file mbio.03862-21-sf003.pdf]

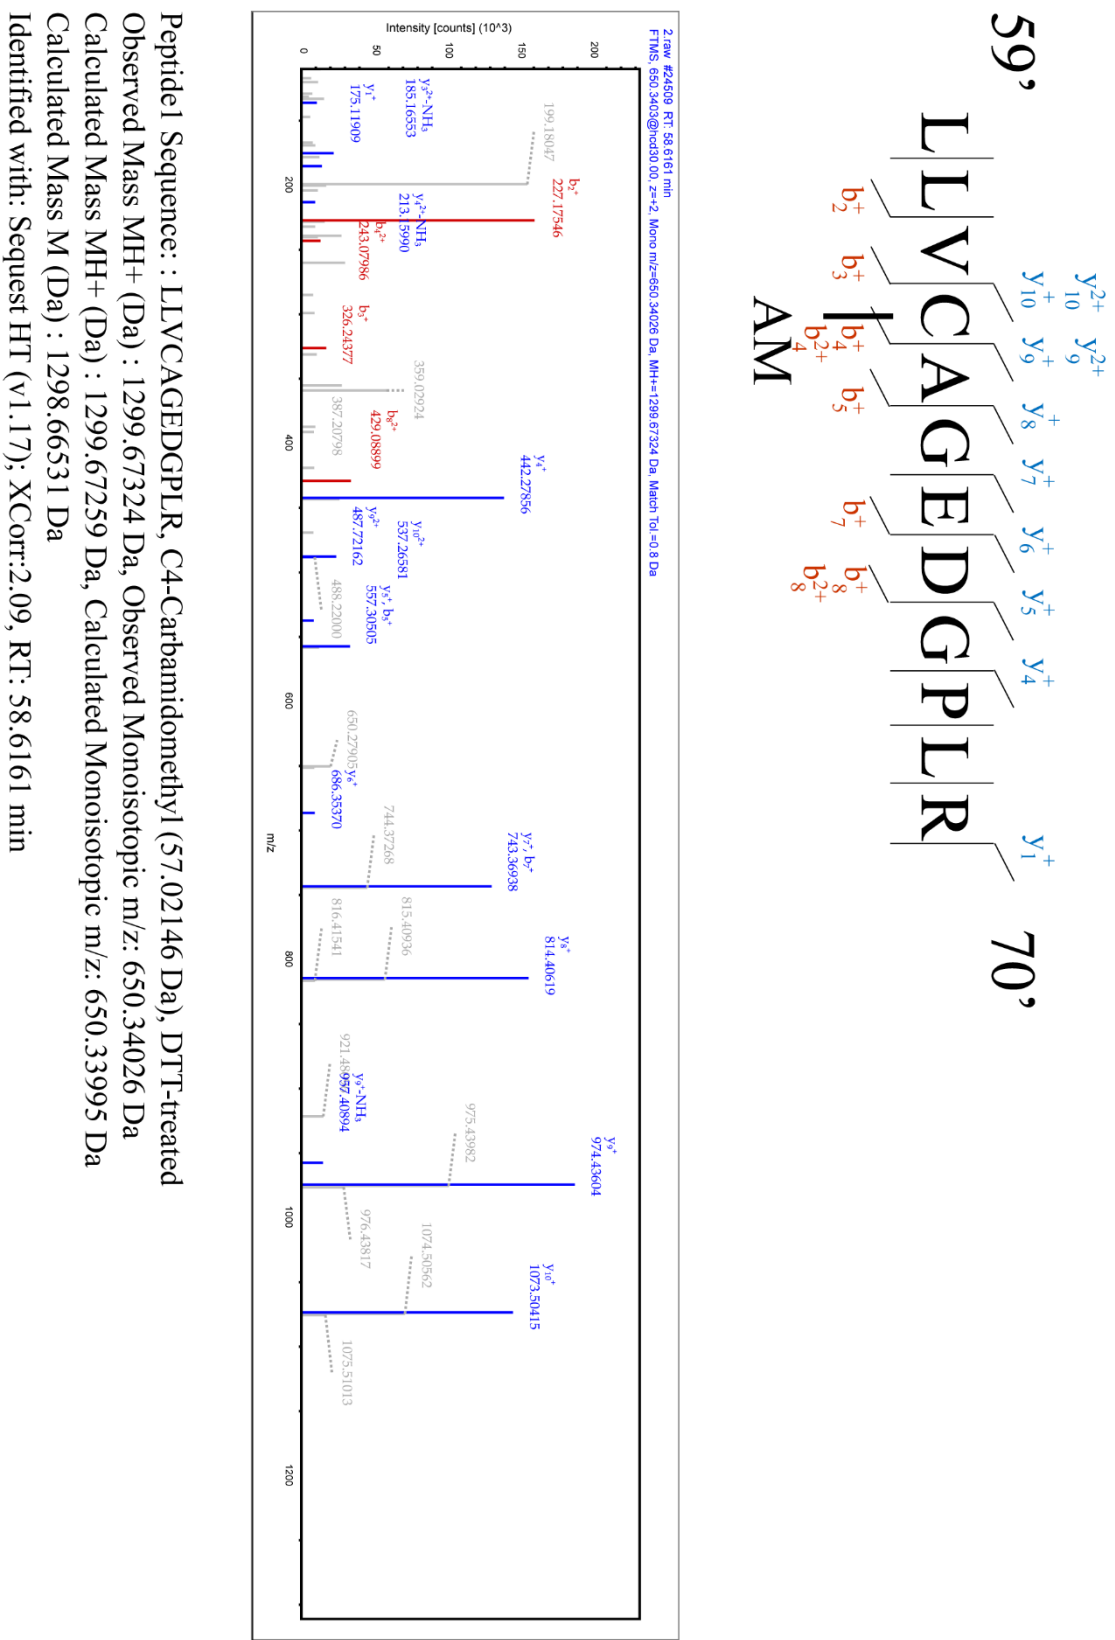

**Figure S3.** MS<sup>2</sup> data of peptide 1 (Cys<sup>62</sup>-AM) (from DTT treated AdpA).
