# Supplementary material for: Sulfane Sulfur Posttranslationally Modifies the Global Regulator AdpA to Influence Actinorhodin Production and Morphological Differentiation of Streptomyces coelicolor
Source: PubMed Central journal article supplement (PMC9239190; doi:10.1128/mbio.03862-21), 2022-04-25
Supplement: mbio.03862-21-sf005.pdf [file mbio.03862-21-sf005.pdf]

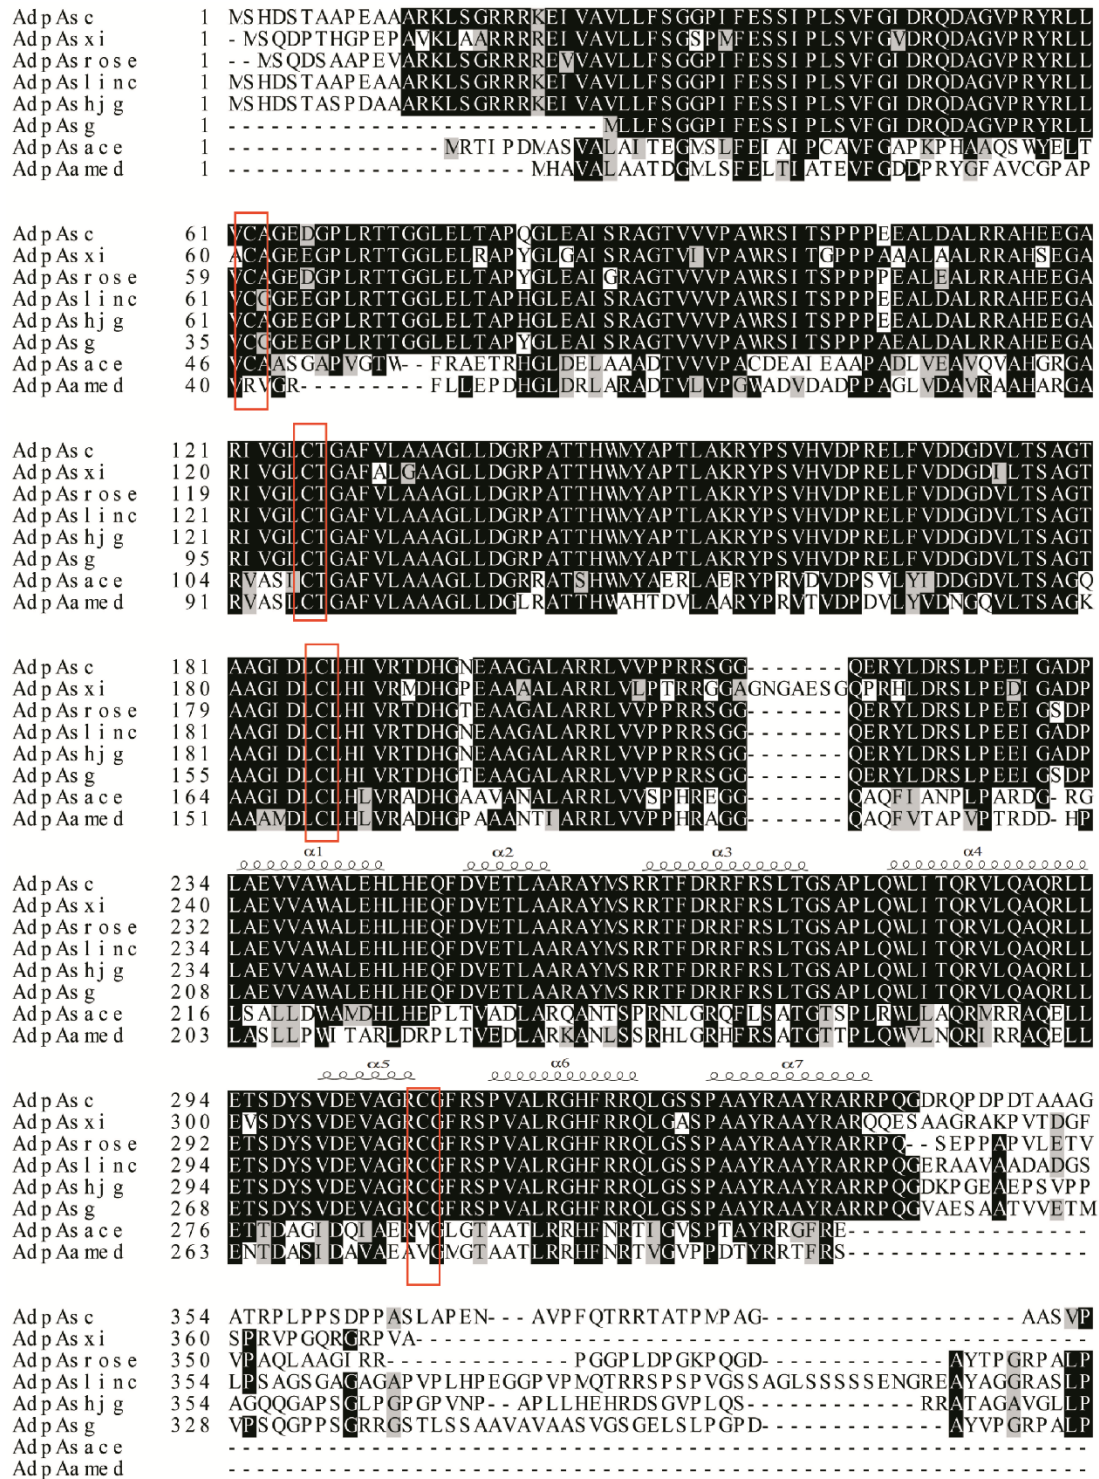

**Figure S5. Sequence alignment of AdpA with its homologues in *Streptomyces* and *Actinomycetes*.** AdpA amino acid sequence of *Streptomyces xiamenensis* 318 (AdpAsxi, SXIM\_38050, WP\_030737153.1), *Streptomyces roseosporus* NRRL 11379 (AdpAsrose, CP979\_13280, KAA6217800.1), *Streptomyces lincolnensis* NRRL 2936 (AdpAslinc, SLINC\_3216, ANS65440.1), *Streptomyces hygrosopicus subsp. jinggangensis* 5008 (AdpAshjg, SHJG\_4295, AEY89567.1), *Streptomyces griseus* (AdpAsg, SGR\_4742, BAG21571.1), *Saccharopolyspora erythraea* NRRL2338 (AdpAsace, SACE\_4523, CAM03792.1), and *Amycolatopsis mediterranei* U32 (AdpAamed, AMED\_7695, ADJ49403.1) were used.
