# Supplementary material for: Sulfane Sulfur Posttranslationally Modifies the Global Regulator AdpA to Influence Actinorhodin Production and Morphological Differentiation of Streptomyces coelicolor
Source: PubMed Central journal article supplement (PMC9239190; doi:10.1128/mbio.03862-21), 2022-04-25
Supplement: mbio.03862-21-st001.pdf [file mbio.03862-21-st001.pdf]

Table S1. Strains and plasmids used in this study

| Strain or plasmid                    | Description                                                                                                | Resource   |
|--------------------------------------|------------------------------------------------------------------------------------------------------------|------------|
| <b><i>S. coelicolor</i> strains</b>  |                                                                                                            |            |
| M145                                 | Wild type strain that produces multiple antibiotics, <i>spc1</i> <sup>-</sup> and <i>spc2</i> <sup>-</sup> | Lab stock  |
| $\Delta pdo$                         | M145 strain with disruption of <i>pdo</i> gene,                                                            | Lab stock  |
| $\Delta adpA$                        | M145 strain with disruption of <i>adpA</i> gene, Apr <sup>R</sup>                                          | This study |
| $\Delta adpA:: adpA$                 | $\Delta adpA$ complemented with pComadpA, Apr <sup>R</sup> , Hyg <sup>R</sup>                              | This study |
| $\Delta adpA:: adpA_{C62S}$          | $\Delta adpA$ complemented with pComadpA <sub>C62S</sub> , Apr <sup>R</sup> , Hyg <sup>R</sup>             | This study |
| $\Delta adpA:: adpA_{C126S}$         | $\Delta adpA$ complemented with pComadpA <sub>C126S</sub> , Apr <sup>R</sup> , Hyg <sup>R</sup>            | This study |
| $\Delta adpA:: adpA_{C187S}$         | $\Delta adpA$ complemented with pComadpA <sub>C187S</sub> , Apr <sup>R</sup> , Hyg <sup>R</sup>            | This study |
| $\Delta adpA:: adpA_{C307S}$         | $\Delta adpA$ complemented with pComadpA <sub>C307S</sub> , Apr <sup>R</sup> , Hyg <sup>R</sup>            | This study |
| $\Delta adpA:: pMS82$                | $\Delta adpA$ complemented with pMS82 vector, Apr <sup>R</sup> , Hyg <sup>R</sup>                          | This study |
| M145- <i>wblAp-egfp</i>              | M145 strain with pMS82- <i>wblAp-egfp</i> , Hyg <sup>R</sup>                                               | This study |
| $\Delta adpA$ - <i>wblAp-egfp</i>    | $\Delta adpA$ strain with pMS82- <i>wblAp-egfp</i> , Apr <sup>R</sup> , Hyg <sup>R</sup>                   | This study |
| M145- <i>actII-4p-egfp</i>           | M145 strain with pMS82- <i>actII-4p-egfp</i> , Hyg <sup>R</sup>                                            | This study |
| $\Delta adpA$ - <i>actII-4p-egfp</i> | $\Delta adpA$ strain with pMS82- <i>actII-4p-egfp</i> , Apr <sup>R</sup> , Hyg <sup>R</sup>                | This study |
| <b><i>E. coli</i> strains</b>        |                                                                                                            |            |
| DH5 $\alpha$                         | Cloning strain                                                                                             | Invitrogen |
| BL21 (DE3)                           | Host used for protein expression                                                                           | Invitrogen |
| ET12567(pUZ8002)                     | Strain used for conjugation, with plasmid pUZ8002, Km <sup>R</sup> , Cm <sup>R</sup>                       |            |
| BL21 (DE3)AdpA                       | Protein expression host with pET-AdpA, Amp <sup>R</sup>                                                    | This study |
| BL21 (DE3) AdpA <sub>C62S</sub>      | Protein expression host with pET-AdpA <sub>C62S</sub> , Amp <sup>R</sup>                                   | This study |
| <b>Plasmids</b>                      |                                                                                                            |            |
| pJTU1278                             | The shuttle vector for gene mutation, Amp <sup>R</sup>                                                     |            |
| pJTU- <i>adpA</i>                    | pJTU1278 derivative for <i>adpA</i> disruption, Apr <sup>R</sup> , Amp <sup>R</sup>                        | This study |
| pIJ773                               | Template for apramycin resistance gene, Apr <sup>R</sup>                                                   |            |
| pET-15b                              | Expression vector for proteins, Amp <sup>R</sup>                                                           | Novagen    |
| pET-AdpA                             | <i>adpA</i> expression vector, Amp <sup>R</sup>                                                            | This study |
| pET-AdpA <sub>C62S</sub>             | <i>AdpA</i> <sub>C62S</sub> expression vector, Amp <sup>R</sup>                                            | This study |
| pMS82                                | Integrative vector for gene complementation,                                                               |            |

|                                      |                                                                                          |            |
|--------------------------------------|------------------------------------------------------------------------------------------|------------|
|                                      | Hyg <sup>R</sup>                                                                         |            |
| pMS82- <i>wblA</i> p- <i>egfp</i>    | Based on pMS82 containing <i>wblA</i> promoter and <i>egfp</i> gene, Hyg <sup>R</sup>    | This study |
| pMS82- <i>actII-4</i> p- <i>egfp</i> | Based on pMS82 containing <i>actII-4</i> promoter and <i>egfp</i> gene, Hyg <sup>R</sup> | This study |
| pMS82- <i>adpA</i>                   | pMS82 derivative for <i>adpA</i> gene complementation, Hyg <sup>R</sup>                  | This study |
| pMS82- <i>adpA</i> <sub>C62S</sub>   | pMS82 derivative for <i>adpA</i> <sub>C62S</sub> gene complementation, Hyg <sup>R</sup>  | This study |
| pMS82- <i>adpA</i> <sub>C126S</sub>  | pMS82 derivative for <i>adpA</i> <sub>C126S</sub> gene complementation, Hyg <sup>R</sup> | This study |
| pMS82- <i>adpA</i> <sub>C187S</sub>  | pMS82 derivative for <i>adpA</i> <sub>C187S</sub> gene complementation, Hyg <sup>R</sup> | This study |
| pMS82- <i>adpA</i> <sub>C307S</sub>  | pMS82 derivative for <i>adpA</i> <sub>C307S</sub> gene complementation, Hyg <sup>R</sup> | This study |

---
