# Supplementary material for: Sulfane Sulfur Posttranslationally Modifies the Global Regulator AdpA to Influence Actinorhodin Production and Morphological Differentiation of Streptomyces coelicolor
Source: PubMed Central journal article supplement (PMC9239190; doi:10.1128/mbio.03862-21), 2022-04-25
Supplement: mbio.03862-21-st002.pdf [file mbio.03862-21-st002.pdf]

**Table S2. Primers used in this study**

| Primers                        | Sequence (5'-3')                                                               | Function                                                         |
|--------------------------------|--------------------------------------------------------------------------------|------------------------------------------------------------------|
| adpA tar-up-f                  | AGGTCGACGGTATCGATA <u>AAGCTTGAC</u>                                            | Amplifying up region for <i>adpA</i> disruption                  |
| adpA tar-up-r                  | GACCTGCTGGAGAAGAACCGC<br>CCAGTCGATTGGCTGAGCTCGCGCGG<br>CACGCCGGCGTCCTGGCG      |                                                                  |
| adpA tar-down-f                | TCATAGCACGATCAACGGCACTGTGA                                                     | Amplifying down region for <i>adpA</i> disruption                |
| adpA tar-down-r                | GAACGCGGTCCCGTTCCAGACCC<br>ACCGCGGTGGCGGCCGCTCTAGAGCT<br>GCTGCGCCGCCACCCCGACGT |                                                                  |
| adpA ver-f                     | TGTCGGTGTTCGGGATCGACCGCCA                                                      | Verification of <i>adpA</i> disruption                           |
| adpA ver-r                     | GCGGGTCTGGAACGGGACCGCGTT                                                       |                                                                  |
| adpA apra-f                    | GAGCTCAGCCAATCGACTGGCGA                                                        | Amplifying apramycin resistance gene for <i>adpA</i> disruption  |
| adpA apra-r                    | ACAGTGCCGTTGATCGTGCTATGA                                                       |                                                                  |
| adpA com-f                     | GAGAACCTAGGATCCAAGCTTCGTCT                                                     | Complementary <i>adpA</i> by pMS82                               |
| adpA com-r                     | GCTGCTGCGGCGTTCCGA<br>TGAAAAACGCTCACTGGTACCAGTGT<br>GCCCCGCCCGGCATCGA          |                                                                  |
| adpA <sup>C62S</sup> com-f     | CTGCTGGTGTCCGCCGGCGAGGAC                                                       | Complementary <i>adpA</i> <sup>C62S</sup> by pMS82               |
| adpA <sup>C62S</sup> com-r     | TCGCCGGCGGACACCAGCAGCCGGT                                                      |                                                                  |
| adpA <sup>C126S</sup> com-f    | ACTGTCCACGGGCGCCTTCGTCTCG                                                      | Complementary <i>adpA</i> <sup>C126S</sup> by pMS82              |
| adpA <sup>C126S</sup> com-r    | C<br>ACGAAGGCGCCCGTGGACAGTCCGA<br>CT                                           |                                                                  |
| adpA <sup>C187S</sup> com-f    | TGTCCTGCACATCGTGCGCACGGAC                                                      | Complementary <i>adpA</i> <sup>C187S</sup> by pMS82              |
| adpA <sup>C187S</sup> com-r    | C<br>TGCGCACGATGTGCAGGGACAGGTC<br>GAT                                          |                                                                  |
| adpA <sup>C307S</sup> com-f    | TGGACGAGGTCCGCCGGGCGCTCCGG                                                     | Complementary <i>adpA</i> <sup>C307S</sup> by pMS82              |
| adpA <sup>C307S</sup> com-r    | CT<br>CGGAGCGCCCGGCGACCTCGTCCA                                                 |                                                                  |
| hrdB- <i>realtime-f</i>        | CGCCGAGTCCGTCTCTGTCA                                                           | Real-time PCR for reference gene                                 |
| hrdB- <i>realtime-r</i>        | GCTCTGCGGCACTGACCATC                                                           |                                                                  |
| adpA- <i>delete-realtime-f</i> | CAGTTCGACGTGGAGACGCT                                                           | Real-time PCR for <i>adpA</i> - <i>delete</i> ( <i>sco2792</i> ) |
| adpA- <i>delete-realtime-r</i> | TCGTCCACCGAGTAGTCCGA                                                           |                                                                  |
| adpA- <i>wt-realtime-f</i>     | ATGAGCCACGACTCCACC                                                             | Real-time PCR for <i>adpA</i> - <i>wt</i> ( <i>sco2792</i> )     |
| adpA- <i>wt-realtime-r</i>     | GATCCCGAACCCGACAGC                                                             |                                                                  |
| wblA- <i>realtime-f</i>        | ATGGGCTGGGTAACCGACTG                                                           | Real-time PCR for <i>wblA</i> ( <i>sco3579</i> )                 |
| wblA- <i>realtime-r</i>        | GCTGCTCCCTGAACGAACAG                                                           |                                                                  |
| actII-4- <i>realtime-f</i>     | GTAATCACCGATGCGGGATGT                                                          | Real-time PCR for <i>actII-4</i> ( <i>sco5085</i> )              |
| actII-4- <i>realtime-r</i>     | AACTCCTCGATGAGCACCCCC                                                          |                                                                  |
| AdpA His15bF                   | GTGCCGCGCGGCAGCCATATGAGCC                                                      | AdpA recombinant expression                                      |
|                                | ACGACTCCACCGCCGCGC ( <i>XhoI</i> )                                             |                                                                  |

|                              |                                                                    |                                  |
|------------------------------|--------------------------------------------------------------------|----------------------------------|
| AdpA His15bR                 | GTTAGCAGCCGGATCCTCGAGTCACG<br>GCGCGCTGCGCTGGCCCGGG ( <i>NdeI</i> ) |                                  |
| AdpA <sup>C62S</sup> His15bF | CTGCTGGTGTCCCGCCGGCGAGGAC                                          | AdpA <sup>C62S</sup> recombinant |
| AdpA <sup>C62S</sup> His15bR | TCGCCGGCGGACACCAGCAGCCGGT                                          | expression                       |
| wblA EMSA-f                  | TCCGAATCCGCCTCGTGTGTCAATC                                          | 284bp fragment for               |
| wblA EMSA-r                  | GCACTCCAGTCGGTTACCCAGCCCA                                          | EMSA                             |
| adpA EMSA-f                  | TTCCGCTTCTTTTCAGCCAACTT                                            | 374bp fragment for               |
| adpA EMSA-r                  | CTCATACTGCTAAGCCCCCTCG                                             | EMSA                             |
| actII-4 EMSA-f               | GGACCCAGCCGTATCAGGAATGCCA                                          | 269bp fragment for               |
| actII-4 EMSA-r               | ACACATCCCGCATCGGTGATTACAT                                          | EMSA                             |
| pMS82- <i>actII-4p-egfp</i>  | GAGAACCTAGGATCCAAGCTTGGAC                                          | 442bp fragment1 for              |
| S1F                          | CTTCGCCGCGCTGGCCA                                                  | <i>actII4p-egfp</i> reporter     |
| pMS82- <i>actII-4p-egfp</i>  | CTCCTCGCCCTTGCTCACCATCTGCG                                         |                                  |
| S1R                          | CCCCGTCGAGATTCT                                                    |                                  |
| pMS82- <i>actII-4p-egfp</i>  | ATGGTGAGCAAGGGCGAGGAGCTGT                                          | 740bp fragment2 for              |
| S2F                          | TCA                                                                | <i>actII4p-egfp</i> reporter     |
| pMS82- <i>actII-4p-egfp</i>  | GAAAAACGCTCACTGGTACCTTACTT                                         |                                  |
| S2R                          | GTACAGCT                                                           |                                  |
| pMS82- <i>wblAp-egfp</i> S1F | GAGAACCTAGGATCCAAGCTTGGAG                                          | 502bp fragment1 for              |
|                              | GCAGCCTACGTTCTCATTC                                                | <i>wblAp-egfp</i> reporter       |
| pMS82- <i>wblAp-egfp</i> S1R | GCTCCTCGCCCTTGCTCACCATACCG                                         |                                  |
|                              | GCGCCGTCCTCTCCCGAAT                                                |                                  |
| pMS82- <i>wblAp-egfp</i> S2F | ATGGTGAGCAAGGGCGAGGAGCTGT                                          | 740bp fragment2 for              |
|                              | TCA                                                                | <i>wblAp-egfp</i> reporter       |
| pMS82- <i>wblAp-egfp</i> S2R | GAAAAACGCTCACTGGTACCTTACTT                                         |                                  |
|                              | GTACAGCT                                                           |                                  |

---
