# Supplementary material for: Sulfane Sulfur Posttranslationally Modifies the Global Regulator AdpA to Influence Actinorhodin Production and Morphological Differentiation of Streptomyces coelicolor
Source: PubMed Central journal article supplement (PMC9239190; doi:10.1128/mbio.03862-21), 2022-04-25
Supplement: mbio.03862-21-t0001.pdf [file mbio.03862-21-t0001.pdf]

## Supplemental method

**Mathematical modelling.** Two ODEs-based deterministic models were developed for better understanding principles of the AdpA controlled promoter system. The integration of ODEs was performed with the *ode45* function in matlab environment (R2014b).

The first model is for the closed negative-feedback loop, which is composed by three differential equations:

$$\frac{dP_{adpA}}{dt} = P_{adpA} \text{ basic} - a \times P_{adpA} \times C_{AdpA} \quad (1)$$

$$\frac{dC_{AdpA}}{dt} = d_{AdpA} \times C_{AdpA} + b \times P_{adpA} \times C_{AdpA} \quad (2)$$

$$\frac{dC_{ActII-4}}{dt} = d_{ActII-4} \times C_{ActII-4} + c \times C_{AdpA} \quad (3)$$

Where  $P_{adpA}$  represents the *adpA* promoter strength,  $P_{adpA} \text{ basic}$  is the basic (or background) strength of *adpA* promoter,  $C_{AdpA}$  and  $C_{ActII-4}$  represent the AdpA and ActII-4 amounts, respectively.  $d_{AdpA}$  and  $d_{ActII-4}$  represent the degradation factor of AdpA and ActII-4, respectively.  $a$ ,  $b$  are  $P_{adpA}$ -AdpA interaction parameters,  $c$  is ActII-4-AdpA interaction parameter. For simulation, the initial values of  $P_{adpA}$ ,  $C_{AdpA}$  and  $C_{ActII-4}$  is all set to 10.  $a$ ,  $b$ , and  $c$  are set to 0.01, 0.02, 0.5, respectively. Both  $d_{AdpA}$  and  $d_{ActII-4}$  are set to -1. All parameters are unitless. The simulating time-scale is set to 0~25.

The second model is for the linear system temporally caused by high  $S^0/AdpA$ , which is composed by two equations:

$$\frac{dC_{AdpA}}{dt} = d_{AdpA} \times C_{AdpA} + b \times \frac{S^0}{AdpA} \quad (4)$$

$$\frac{dC_{ActII-4}}{dt} = d_{ActII-4} \times C_{ActII-4} + d \div \frac{S^0}{AdpA} \quad (5)$$

Where  $\frac{S^0}{AdpA}$  represents the  $S^0/AdpA$  ratio,  $b$  represents the positive effect of  $S^0/AdpA$

on  $C_{\text{AdpA}}$ ,  $d$  represents the negative effect of  $S^0/\text{AdpA}$  on  $C_{\text{ActII-4}}$ . For simulation, the initial values of  $C_{\text{AdpA}}$  and  $C_{\text{ActII-4}}$  are both set to 10.  $\frac{S^0}{\text{AdpA}}$  is set to 50, both  $b$  and  $d$  are set to 1, both  $d_{\text{AdpA}}$  and  $d_{\text{ActII-4}}$  are set to -1. All parameters are unitless. The simulating time-scale is set to 0~25.
